# Supplementary material
Source: PubMed Central journal article supplement (PMC4300393)
Supplement: NIHMS61850-supplement-Supplementary.pdf [file NIHMS61850-supplement-Supplementary.pdf]

**Transcriptionally active chromatin recruits homologous recombination at DNA double strand breaks.**

Aymard, F., Bugler, B., Schmidt, C. K., Guillou, E., Caron, P, Briois, S, Iacovoni, J.S , Daburon, V, Miller, K. M, Jackson, S. P, and Legube, G.

**Supplementary Information file:** Supplementary Figure 1-8 and Supplementary Table 1-4

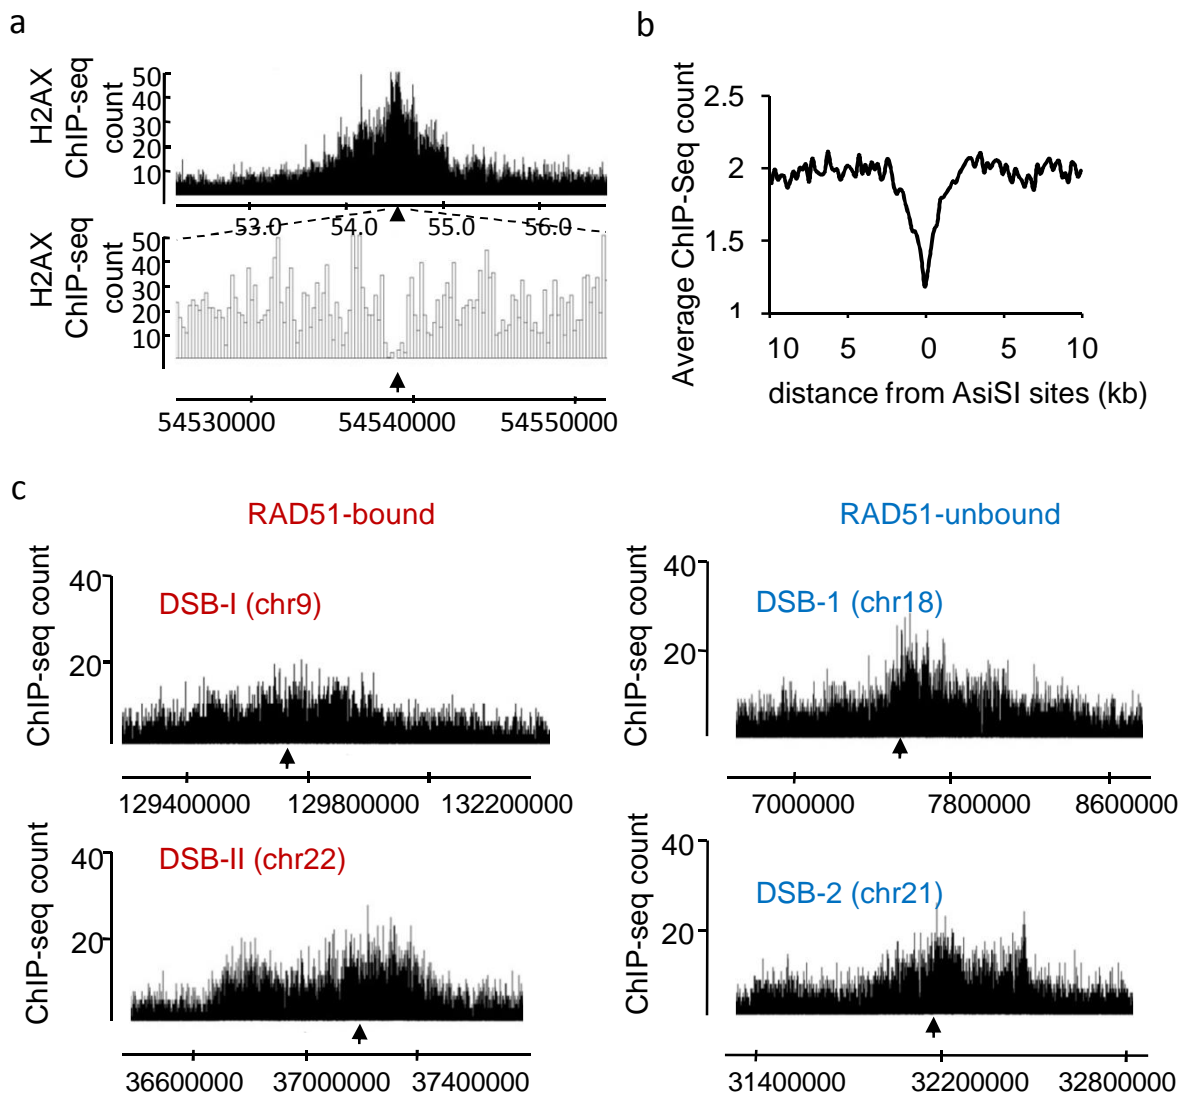

**Supplementary Figure 1:  $\gamma$ H2AX profile around AsiSI-induced DSBs.**

ChIP-seq against  $\gamma$ H2AX (Epitomics) performed in 4OHT treated DivA cells. **a**. A representative  $\gamma$ H2AX domain is presented (top panel, chromosome position are indicated in Mbp). A magnification of the  $\gamma$ H2AX enrichment at the proximity of the DSB is shown (bottom panel, chromosomal positions are in bp). The DSB is indicated by an arrow. **b**. Average  $\gamma$ H2AX signal on a 20kb window around each annotated AsiSI site on the human genome. **c**. The  $\gamma$ H2AX signal obtained by ChIP-seq, around the DSBs presented Fig. 1b is shown. DSBs are indicated by arrows. RAD51-bound DSBs are indicated in red, and RAD51-unbound DSBs in blue.

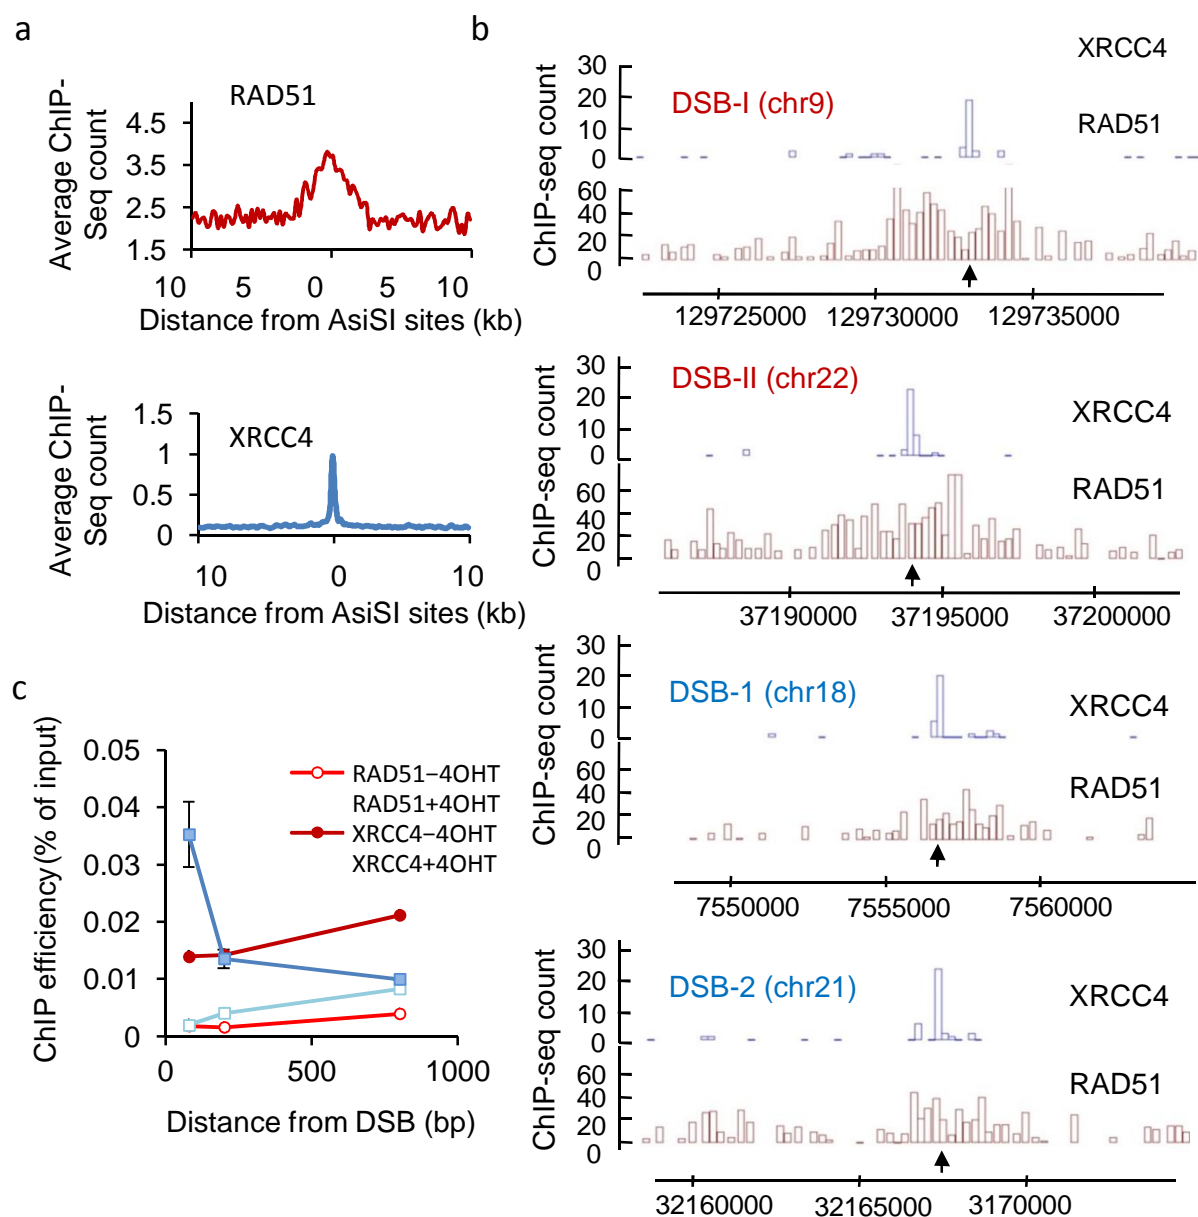

### Supplementary Figure 2 : Binding of RAD51 and XRCC4 at AsiSI-induced DSBs.

**a.** Duplicate ChIP-seq experiment in 4OHT treated DivA cells using an anti XRCC4 antibody (Abcam) or an anti-RAD51 antibody (Santa Cruz). The averaged XRCC4 (blue) and Rad51 (red) signal on 10kb around annotated AsiSI sites on the human genome are shown. **b.** Signals obtained around the four DSBs presented Fig. 1b are shown. Positions are indicated in bp. **c.** ChIP experiments performed in DivA cells, treated (filled circles) or not (empty circles) with 4OHT, using an anti-XRCC4 antibody (blue) or an anti-RAD51 antibody (red). ChIP efficiencies (as percent of input immunoprecipitated) were measured by RT-qPCR at 80, 200 and 800bp from an AsiSI induced DSB (DSB-III). Mean and S.e.m (technical replicates n=4) of representative experiment is shown.

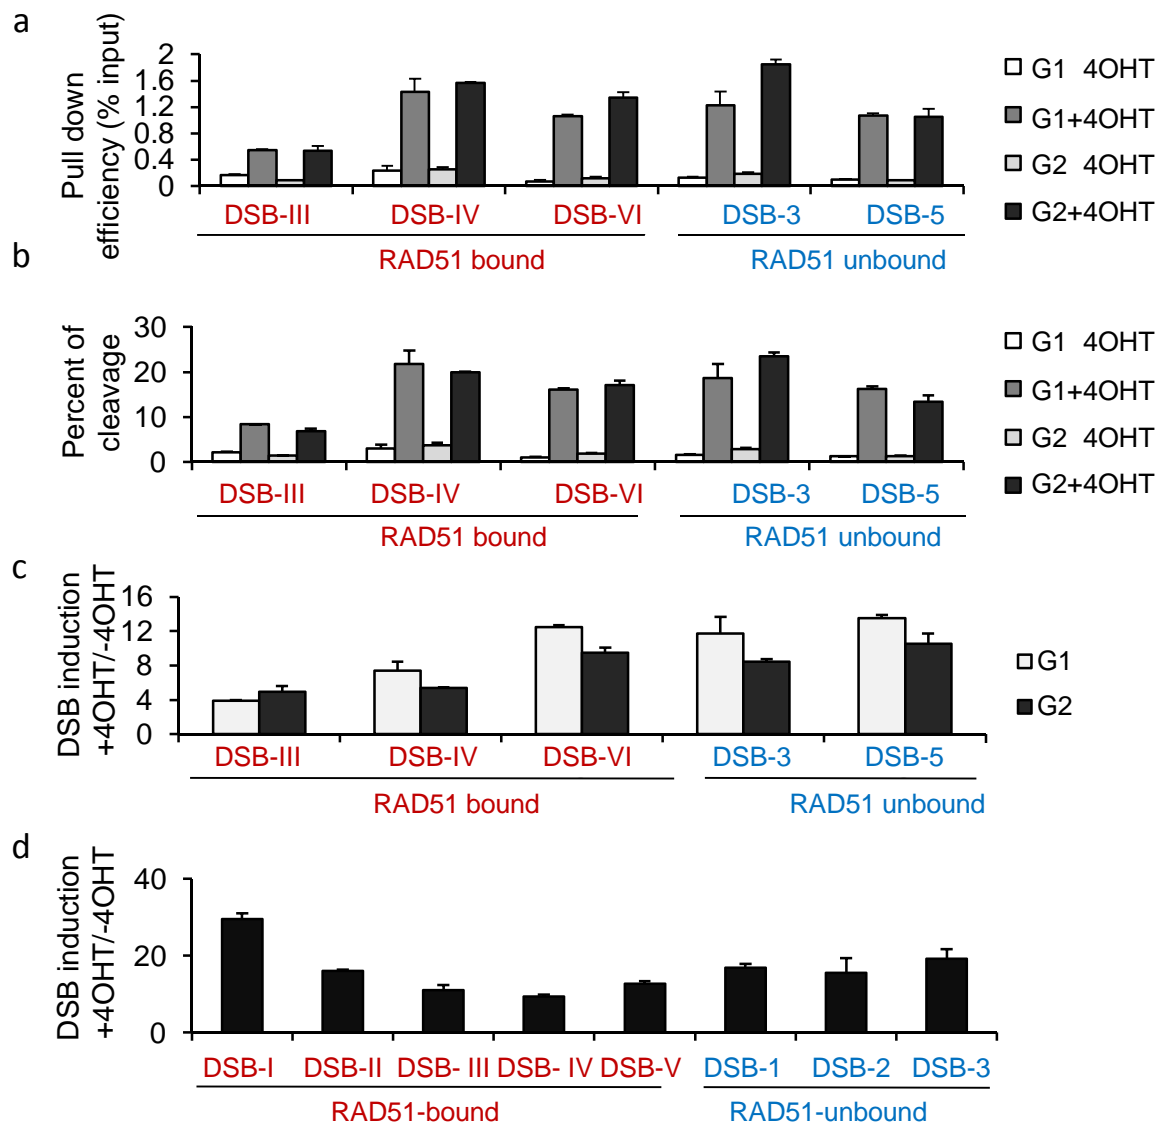

**Supplementary Figure 3 : Measure of cleavage efficiency at selected AsiSI sites, throughout the cell cycle.**

Cleavage efficiency (using the protocol described in the online methods) was measured from untreated or 4OHT-treated cells by RT-qPCR for five AsiSI sites either identified as RAD51-bound or RAD51-unbound. The same representative experiment is presented in a, b and c. **a.** Raw qPCR data, as percent of input pulled down by the streptavidin purification are shown. **b.** The data presented in (a) were further normalized using an internal control constituted by *in vitro* AsiSI-digested plasmid added in the ligation reaction. This allows calculating the cutting efficiency at each specific sites as percent of cleavage (the *in vitro* digested plasmid representing the 100% cleavage). **c.** Ratios between treated and untreated cells are presented (using the normalized data presented in b). This last representation will be used throughout the manuscript. **d.** Pull own efficiency was measured by RT-qPCR for the eight AsiSI sites analyzed for the presence of ssDNA in Fig. 3a. Ratios between treated and untreated cells are presented. Mean and s.e.m (technical replicates, n=4) of a representative experiment is shown.

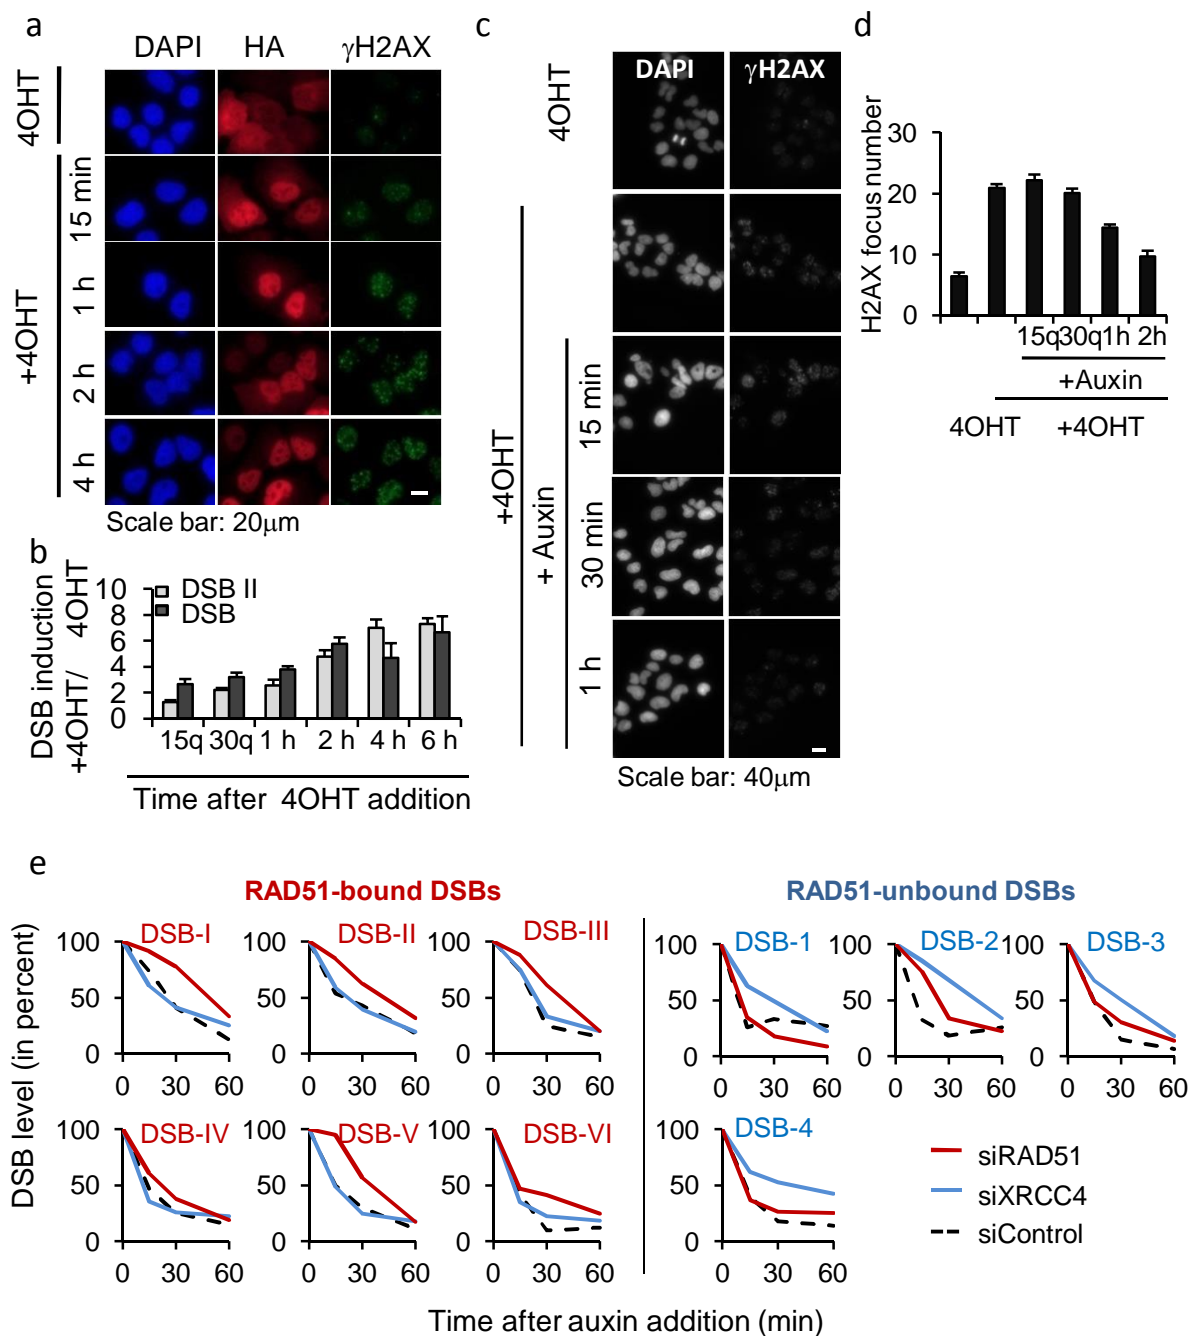

**Supplementary Figure 4 : Kinetics of DSB induction and disappearance in the AID-DivA cell line.**

**a.** HA and  $\gamma$ H2AX staining in AID-DivA treated as indicated. **b.** Measure of cleavage efficiency, at two AsiSI-induced DSBs, in AID-DivA cells treated as indicated. **c.**  $\gamma$ H2AX staining in AID-DivA cells treated (or not) with 4OHT for 4h and further incubated with auxin (or not) as indicated. **d.**  $\gamma$ H2AX foci observed in AID-DivA cells treated as in c, were counted using images aquired with an Array-Scan device. The mean and s.e.m (n=5, biological replicates, about 200 aquired nuclei per experiment) are presented. **e.** Repair analysis of AsiSI-induced RAD51-unbound (in blue, right panel) or RAD51-bound (in red, left panel) DSBs in AID-DivA cells transfected with control, RAD51, or XRCC4. A biological replicate from Fig. 3f is shown.

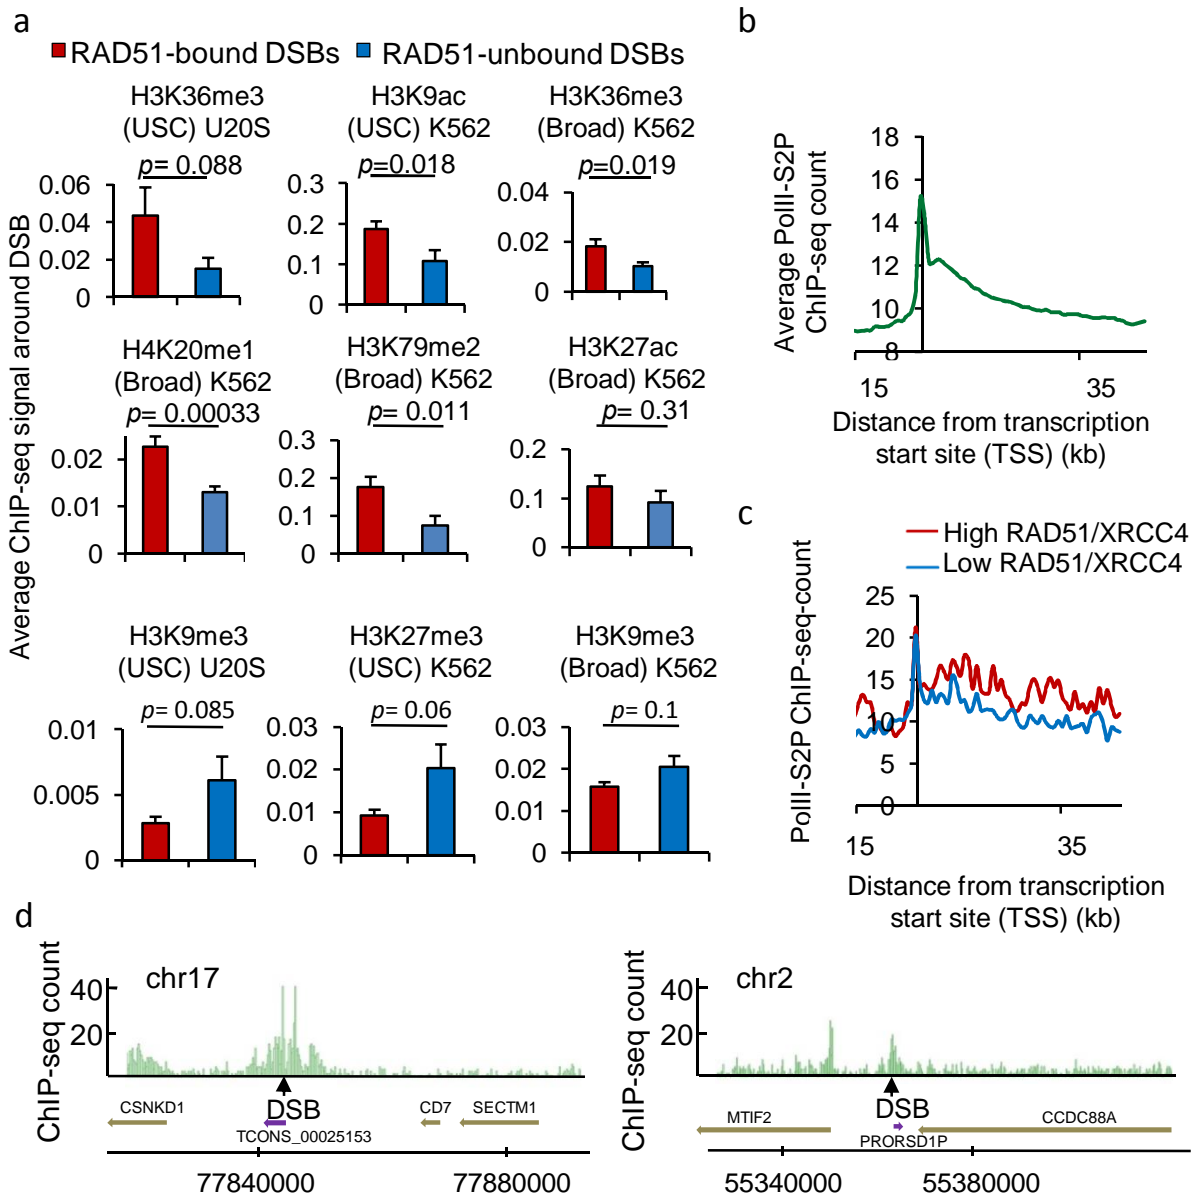

### Supplementary Figure 5 : HR-prone DSBs are enriched in active chromatin marks and in PolII-S2P.

**a.** ChIP-seq data of various histones marks, associated with active (top and middle panels) or inactive (bottom panels) chromatin in U20S and K562 cells were retrieved from the ENCODE project, over 4kb surrounding each DSB from the RAD51-bound (red) and RAD51-unbound subsets (blue). The name of the Institute that generated the data are indicated in parentheses. The average and s.e.m are shown.  $p$  values (Mann-Whitney) are shown above each graphs. **b.** Average PolII-S2P signal obtained by ChIP-seq in DivA cells, around the transcription start sites (TSS) of all genes from the human genome (hg18). **c.** Similar analysis than for Fig.4b except that all cleaved DSBs (100 best) were divided in two categories of 50 DSBs each based on their ratio RAD51/XRCC4. **d.** The Pol II-S2P signal obtained around two RAD51-bound DSBs, but far from any annotated gene (RefSeq, indicated in brown) are shown. DSBs are indicated by arrows, and positions are in bp. Feature from in lincRNA (large intergenic non coding RNAs) and TUCP (transcripts of uncertain coding potential) database (UCSC)(left panel), or from annotated pseudogene and non coding RNA (UCSC)(right panel) are indicated in purple.

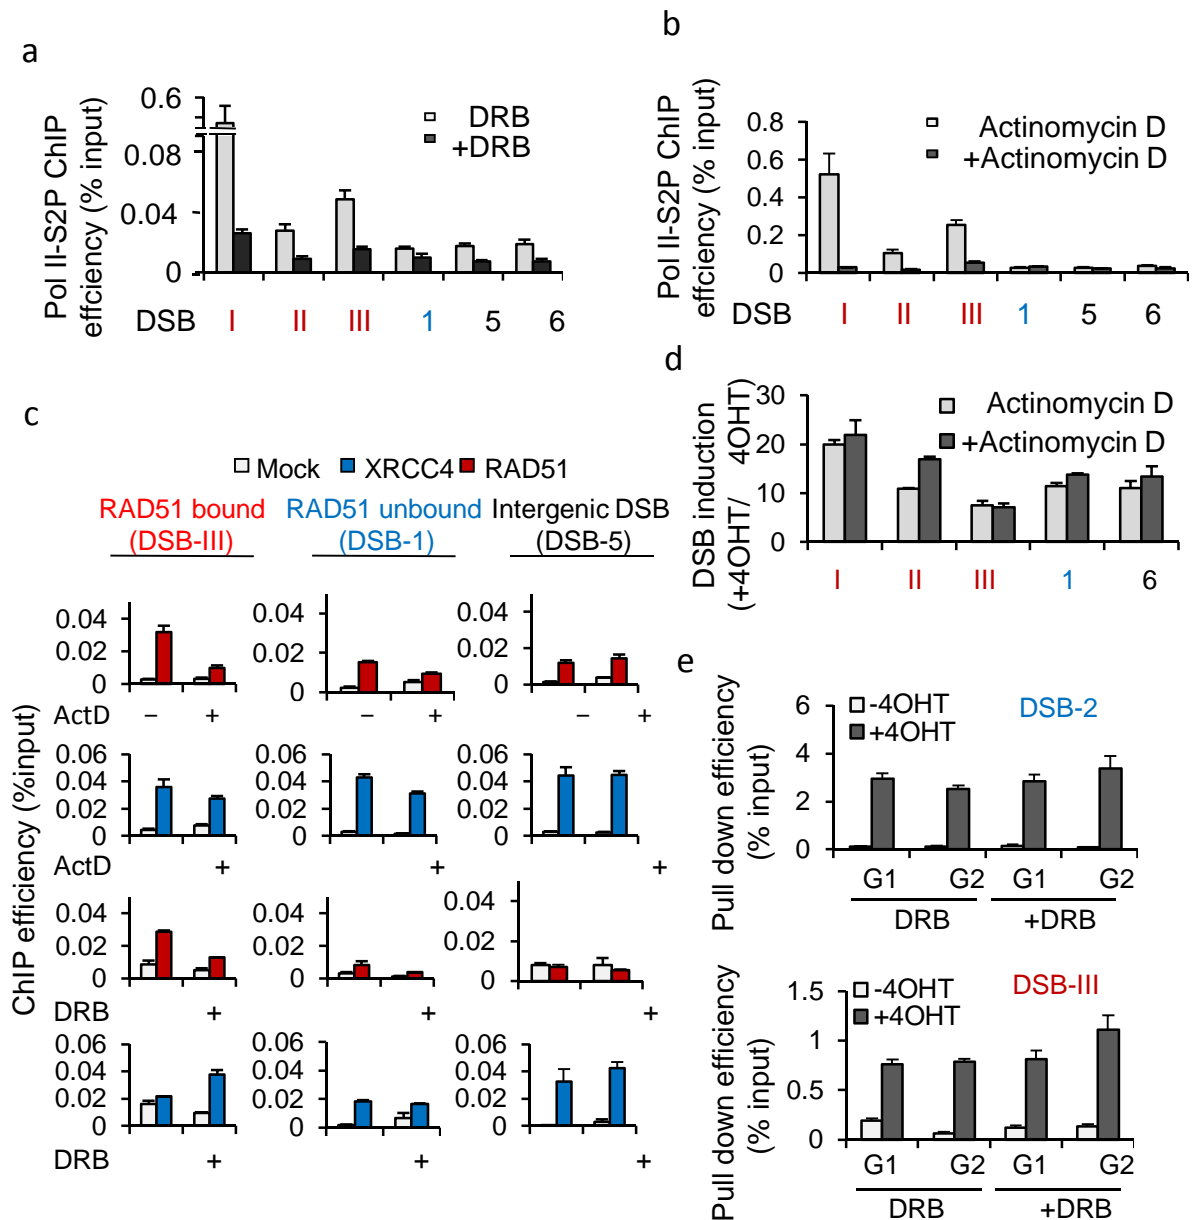

**Supplementary Figure 6 : Effect of DRB and Actinomycin D on transcription, RAD51 binding and AsiSI-mediated break induction.**

ChIP using a PolII-S2P antibody in 4OHT-treated DivA cells incubated with DRB (a) or Actinomycin D (b) PolII-S2P levels were analyzed within a 1kb region around DSBs shown Fig. 4c-d, i.e. three RAD51-bound DSBs (DSB-I; -II; -III), one RAD51-unbound DSB (DSB-1), and two DSBs located far from any gene (DSB-5, -6). c. XRCC4 (blue) and RAD51 (red) ChIP in 4OHT-treated DivA incubated with Actinomycin D or DRB as indicated. XRCC4 and RAD51 enrichments were respectively analyzed close to (<100bp) and at 800bp from selected DSBs, by RT-qPCR. The mean and s.e.m (n=4 technical replicates) of % of input immunoprecipitated for three DSBs (one RAD51-bound: DSB-III, one RAD51-unbound: DSB-1, and one intergenic: DSB-5) are shown. d. Analysis of cleavage efficiency in DivA cells incubated with Actinomycin D (or not) (see online Methods). e. Analysis of cleavage efficiency in DivA cells in G1 or G2 synchronized cells, and in presence or absence of DRB treatment as indicated, at an AsiSI site either identified as RAD51-bound (in red), or RAD51-unbound (in blue). Mean and s.e.m (n=4, technical replicates) of the raw qPCR data of a representative experiment, as percent of input pulled down by the streptavidin purification are shown.

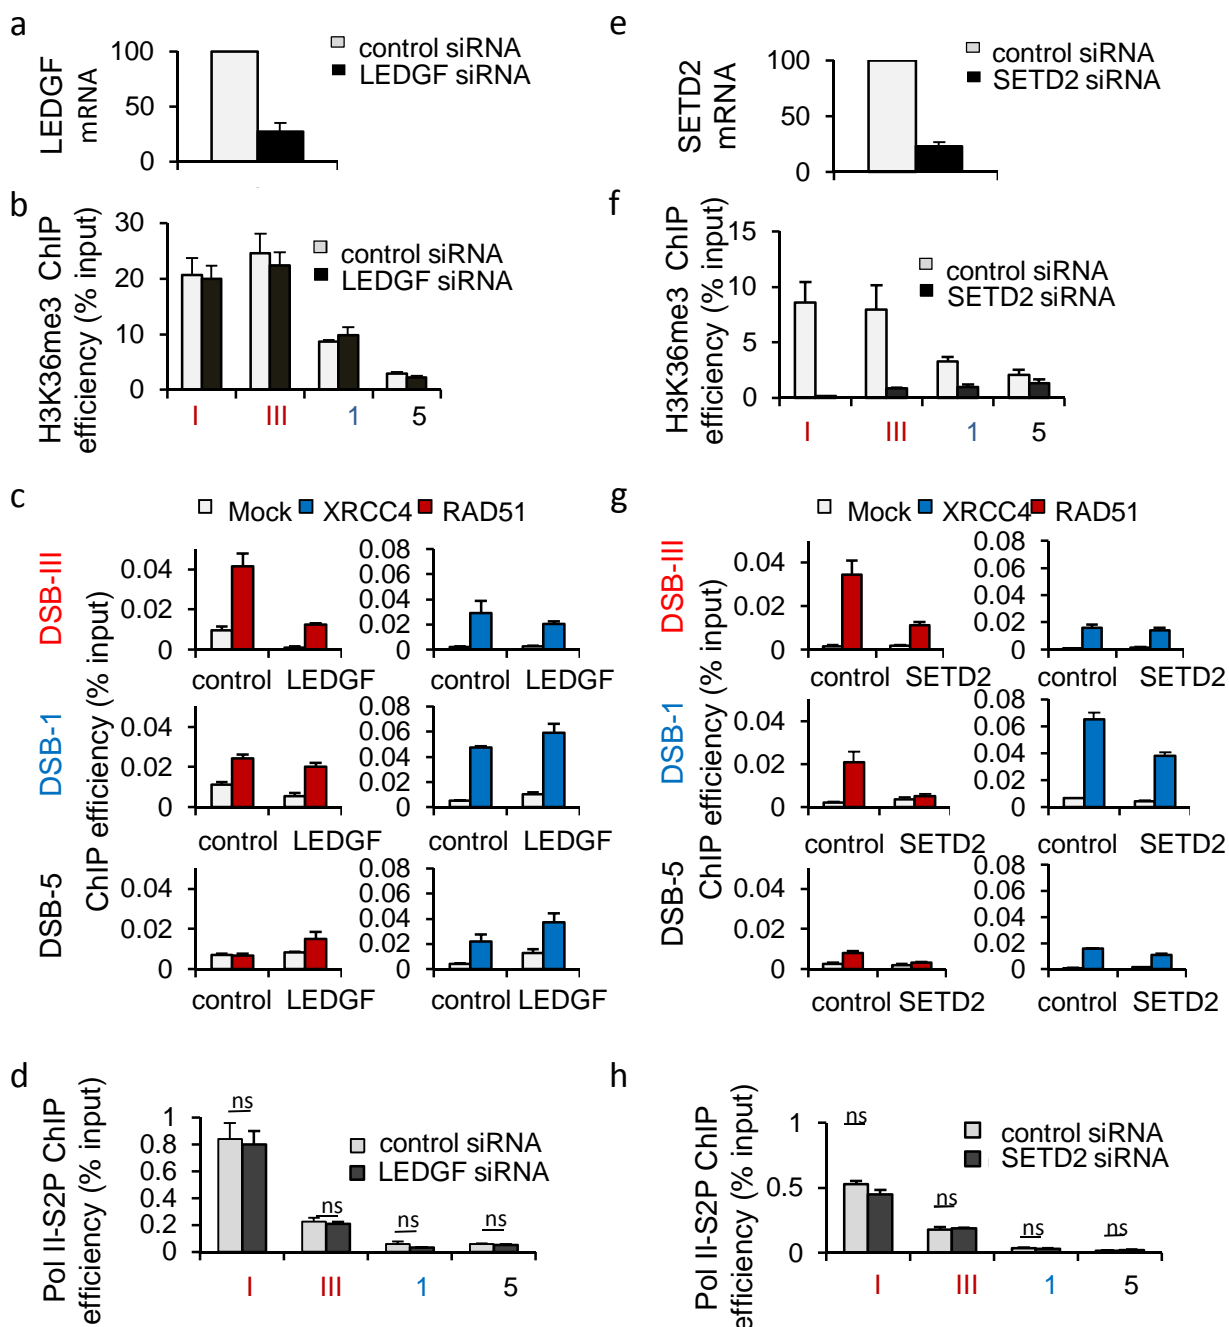

**Supplementary Figure 7 : Effect of LEDGF and SETD2 siRNAs on H3K36me3, RAD51/XRCC4 and PolII-S2P levels.**

DivA cells were transfected using a control siRNA, a siRNA directed against LEDGF (a-d) or a siRNA directed against SETD2 (e-h). **a,e**. Relative mRNA level assessed by reverse transcription followed by qPCR. **b,f**. H3K36me3 ChIP analysed by qPCR at selected sites. **c,g** XRCC4 (blue) and RAD51 (red) ChIP after 4OHT-treatment respectively analyzed close to (<100bp) and at 800bp from selected DSBs. ChIP efficiencies (as % of input) are shown for 3 DSBs (RAD51 bound (DSB-III), RAD51 unbound (DSB-1), and intergenic (DSB-5)). The mean and s.e.m (n=4, technical replicate) of a representative experiment are presented. **d, h** PolII-S2P ChIP analyzed within a 1kb window around DSBs. The mean and s.e.m (n=4, technical replicate) of a representative experiment are presented. p values are indicated, ns non-significant (unpaired student test, two sided)

Figure 3b

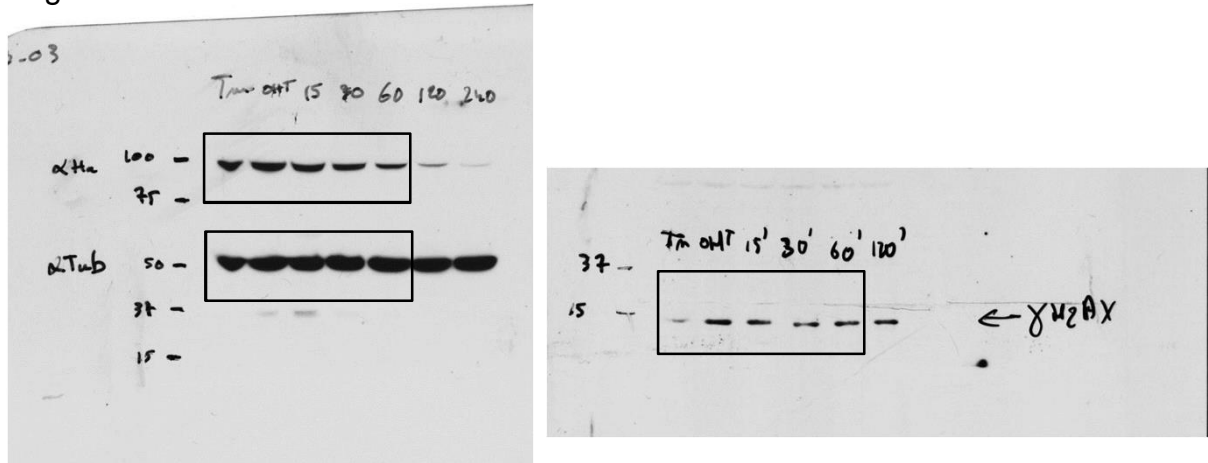

Figure 3e

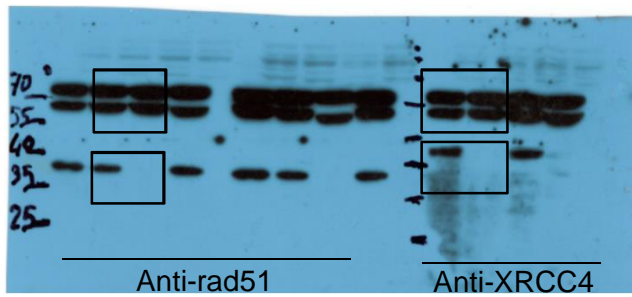

Supplementary Figure 8 : Uncropped blots presented on figure 3



a

| DSB     | Chromosome | AsiSI position | closest gene | Distance from the gene (bp) |
|---------|------------|----------------|--------------|-----------------------------|
|         | Chr1       | 19684735       | CAPZB        | 942                         |
|         | Chr2       | 55362598       | CCDC88A      | 50907                       |
|         | Chr3       | 52207196       | ALAS1        | Intragenic                  |
|         | Chr7       | 2733591        | GNA12        | 680                         |
| DSB-I   | Chr9       | 129732985      | PIP5KL1      | 83                          |
|         | Chr9       | 129929222      | PTGES2       | Intragenic                  |
|         | Chr9       | 136357891      | RXRA         | 250                         |
| DSB-III | Chr17      | 5914679        | WSCD1        | Intragenic                  |
| DSB-IV  | Chr17      | 77844122       | CSNK1D       | 19959                       |
|         | Chr17      | 77824392       | CSNK1D       | Intragenic                  |
|         | Chr17      | 5330937        | MIS12        | 515                         |
|         | Chr17      | 4216265        | UBE2G1       | Intragenic                  |
|         | Chr17      | 20886885       | USP22        | Intragenic                  |
|         | Chr19      | 46595575       | BCKDHA       | Intragenic                  |
|         | Chr19      | 2407588        | LMNB2        | Intragenic                  |
|         | Chr19      | 2406985        | LMNB2        | Intragenic                  |
|         | Chr19      | 2407086        | LMNB2        | Intragenic                  |
| DSB-V   | Chr20      | 30409966       | ASXL1        | Intragenic                  |
| DSB-VI  | Chr20      | 41520524       | SFRS6        | Intragenic                  |
| DSB-II  | Chr22      | 37194040       | KDELR3       | Intragenic                  |

b

| DSB   | Chromosome | AsiSI position | Closest gene | Distance from the gene(bp) |
|-------|------------|----------------|--------------|----------------------------|
|       | Chr1       | 40747224       | DEM1         | Intragenic                 |
|       | Chr2       | 207738966      | KLF7         | 102                        |
|       | Chr2       | 68238246       | PNO1         | 267                        |
|       | Chr2       | 43211836       | ZFP36L2      | 91208                      |
|       | Chr3       | 39825968       | MYRIP        | 343                        |
|       | Chr4       | 178600563      | AGA          | Intragenic                 |
|       | Chr5       | 142765236      | NR3C1        | Intragenic                 |
| DSB-3 | Chr6       | 90404901       | LYRM2        | Intragenic                 |
|       | Chr6       | 50025535       | DEFB133      | 414                        |
|       | Chr6       | 135861034      | MIR548H4     | Intragenic                 |
|       | Chr8       | 116749799      | TRPS1        | Intragenic                 |
|       | Chr9       | 29202793       | LINGO2       | Intragenic                 |
|       | Chr10      | 94040987       | MARCH5       | Intragenic                 |
|       | Chr11      | 24475044       | LUZP2        | 52                         |
|       | Chr11      | 75203401       | UVRAG        | 463                        |
|       | Chr15      | 66899167       | ANP32A       | Intragenic                 |
| DSB-1 | Chr18      | 7556705        | PTPRM        | 613                        |
| DSB-4 | Chr19      | 34711320       | VSTM2B       | Intragenic                 |
| DSB-2 | Chr21      | 32167382       | HUNK         | 121                        |
|       | ChrX       | 72699821       | CHIC1        | Intragenic                 |

### Supplementary Table 1: Subset of RAD51-bound and RAD51-unbound AsiSI-induced DSBs.

AsiSI sites positions are indicated as well as the identity of the nearest gene (according the hg18 human genome). The sites indicated in blue are far from any annotated gene and were thus removed for the Pol II-S2P and H3K36me3 averaging analyses presented Fig. 4b and Fig. 6b. DSB-I to -VI and -1 to -4 used throughout the manuscript are indicated. **a.** RAD51-bound DSBs. **b.** RAD51-unbound DSBs.

|         | Forward                  | Reverse                 |
|---------|--------------------------|-------------------------|
| Control | CAUGUCAUGUGUCACAUCUtt    | AGAUGUGACACAUGACAUGtt   |
| RAD51   | CCAGAUCUGUCAUACGCUAtt    | UAGCGUAUGACAGAUCUGGtt   |
| XRCC4   | AAUCUUGGGACAGAACCUAAAAtt | UUUAGGUUCUGUCCCAAGAUUtt |
| SETD2   | GUGAAGGAGUAUGCACGAAAtt   | UUCGUGCAUACUCCUUCACtt   |
| LEDGF   | CAGCCCUGUCCUUCAGAGAtt    | UCUCUGAAGGACAGGGCUGtt   |

**Supplementary Table 2: siRNA sequences used in this study.**

|                         | primer FW             | primer REV            |
|-------------------------|-----------------------|-----------------------|
| DSB-1_800bp             | GGAGAAGTGGCAGGACAATG  | CAAGGCCAAATTTGGGGACTA |
| DSB-1_80bp              | TCCCCTGTTTCTCAGCACTT  | CTTCTGCTGTTCTGCGTCTT  |
| DSB-1_gene              | CATGCCTCAGAAACGTTGAA  | GGTGCAGTGGTGCAATCATA  |
| DSB-2_800bp             | TTTTTGGGGGAAAGAGGTG   | AGTGGGTGAGCCATTCAAAG  |
| DSB-2_80bp              | ATCGGGCCAATCTCAGAGG   | GCGACGCTAACGTTAAAGCA  |
| DSB-2_gene              | TGCAGTTCTCCAATGACAGG  | CATCTTTCAGGTGCTGGTCA  |
| DSB-3_800bp             | GGCACCTCAACAGGTAGCAT  | GCCTCTCTTCGATGCTTTTTG |
| DSB-3_80bp              | GGAAGGAGGGGCTACTAGGG  | GAAAGCCCCATTCAAGTTTGA |
| DSB-3_gene              | CAAAGATGACCACAGCCTCA  | CACACCCCAAGAAAAGAGGA  |
| DSB-4_800bp             | CGTGGGGAAGTTAAGGAACA  | CCCCATCACGTTAACCAAAC  |
| DSB-4_80bp              | AGGGTCGGGTTCTCTTTTGT  | CCCGGTGCTAGGAGGAAT    |
| DSB-4_gene              | TTACTGTGTGCCACGCTCTC  | CTCTTTTCTTGGGGGCTACC  |
| DSB-5_800bp             | GGGGAATTTGGGCATTAGTT  | TTCGCCTCTTGTTCTCTGT   |
| DSB-5_80bp              | GGTGCCACAGCTCTCTATG   | GAAGCCAGAGGAGTGCCTG   |
| DSB-6_800bp             | GCTCAGTGTCTGGAAAATGGA | GCCTCTTGGGCTCTTCCTTA  |
| DSB-6_80bp              | TTCGACACCATCTCGGAACT  | GATGCTCCTCGCTCACTACC  |
| DSB-I_800bp             | TATGGGACCAAGCGAGTAGG  | GCCTCACACACACCCATA    |
| DSB-I_80bp              | GTCCCTCGAAGGGAGCAC    | CCGACTTTGCTGTGTGACC   |
| DSB-I_gene              | TGCAAGGCATTGACAATAA   | ATGGAAGCCATAATGCAAGC  |
| DSB-II_800bp            | GGGTATGGAGCTGCCTCTAA  | GACAAAGATGGCTGGAGGAG  |
| DSB-II_80bp             | CCGCCAGAAAGTTTCTAGA   | CTCACCCCTTGACACTTG    |
| DSB-II_gene             | TGTGAGGGCTCAGTGAGATG  | ACATTCCTCACCTGCCAAAC  |
| DSB-III_800bp           | GGGACAGCGCTACTTTG     | TCGCTAGGCCAGCAGTT     |
| DSB-III_200bp           | GGGGCTTTTGGGAAAATTAC  | AGCGACACTCTTGCCTCTG   |
| DSB-III_80bp            | CCGTCCGTTACGTAGAATGC  | GGGCGGGGATTATGTAATTT  |
| DSB-III_gene            | CAGGCCGTTGAACAGTTAT   | TCAGCTGCAAAAACAGTTGC  |
| DSB-IV_800bp            | GAGGAACCATTGCGACAAGA  | CTGACCAAGGAAGCCTCAAG  |
| DSB-IV_80bp             | GAGGAGCGCAGGACACTG    | CCAATTAGAGACCACCCGTTT |
| DSB-V_800bp             | GTCAGTATGGCCCAGAGTC   | ACGGCTGATGGACTTAGACG  |
| DSB-V_80bp              | CCTAGCTGAGGTCGGTGCTA  | GAAGAGTGAGGAGGGGAGT   |
| DSB-V_gene              | AAGCCACAGCCCACTAAAGA  | GGCTGTCTCAAGCAAACCTC  |
| DSB-VI_800bp            | ACCCTTTGGCTGACCTTACC  | TGAGGTTTTTGGTGGTGGTT  |
| DSB-VI_80bp             | GGTTTGGGTGTTTGGTTTTG  | GCCCCGAACCTCTAACTAA   |
| DSB-VI_gene             | AAAAGTCGCTCCCGTAAAT   | CCGATCAGACTTGGGCTTAG  |
| DSB (fig. 3d, Fig.S 4b) | GATTGGCTATGGGTGTGGAC  | CATCCTTGCAAACCAGTCTT  |
| GBP1-TALEN_80bp         | CCCAAACCTTCCATTTTCTT  | GGTCAGAGGGGACACCTGTA  |
| GBP1-TALEN_800bp        | TTGCAGGATAGGACTCGTGA  | GGCCAAACTTAGCAACCAGA  |

**Supplementary Table 3 : oligonucleotides for RealTime Quantitative PCR used in this study.**

|                   | Primer FW_biotinylated        | Primer REV_specific                                         |
|-------------------|-------------------------------|-------------------------------------------------------------|
| Cleavage          | CGCAAGCTTTAATACGACTCACTATAGGG | CCCTATAGTGAGTCGTATTAAGCTTGCG <u>AT</u>                      |
| Resection_DSB-1   | CGCAAGCTTTAATACGACTCACTATAGGG | CCCTATAGTGAGTCGTATTAAGCTTGCG <u>ATCGC</u> <u>CAGCCCGCTC</u> |
| Resection_DSB-2   | CGCAAGCTTTAATACGACTCACTATAGGG | CCCTATAGTGAGTCGTATTAAGCTTGCG <u>ATCGC</u> <u>GGTGGCGGCG</u> |
| Resection_DSB-3   | CGCAAGCTTTAATACGACTCACTATAGGG | CCCTATAGTGAGTCGTATTAAGCTTGCG <u>ATCGC</u> <u>TCCTAGCCGC</u> |
| Resection_DSB-I   | CGCAAGCTTTAATACGACTCACTATAGGG | CCCTATAGTGAGTCGTATTAAGCTTGCG <u>ATCGC</u> <u>CTGCGGGTCC</u> |
| Resection_DSB-II  | CGCAAGCTTTAATACGACTCACTATAGGG | CCCTATAGTGAGTCGTATTAAGCTTGCG <u>ATCGC</u> <u>TAAGGAATGC</u> |
| Resection_DSB-III | CGCAAGCTTTAATACGACTCACTATAGGG | CCCTATAGTGAGTCGTATTAAGCTTGCG <u>ATCGC</u> <u>AGCGGTTTTA</u> |
| Resection_DSB-IV  | CGCAAGCTTTAATACGACTCACTATAGGG | CCCTATAGTGAGTCGTATTAAGCTTGCG <u>ATCGC</u> <u>CAGACGCGGC</u> |
| Resection_DSB-V   | CGCAAGCTTTAATACGACTCACTATAGGG | CCCTATAGTGAGTCGTATTAAGCTTGCG <u>ATCGC</u> <u>TAAGGAATGC</u> |

**Supplementary Table 4: Double strand oligonucleotides used for cleavage and resection assay.**

The 3' protruding end is underlined. Sequences specific for each site are indicated in red.
